# Supplementary material
Source: MDPI journal article supplement (https://www.mdpi.com/1999-4907/12/5/584)
Supplement: s1 [file s1]

## Supplementary

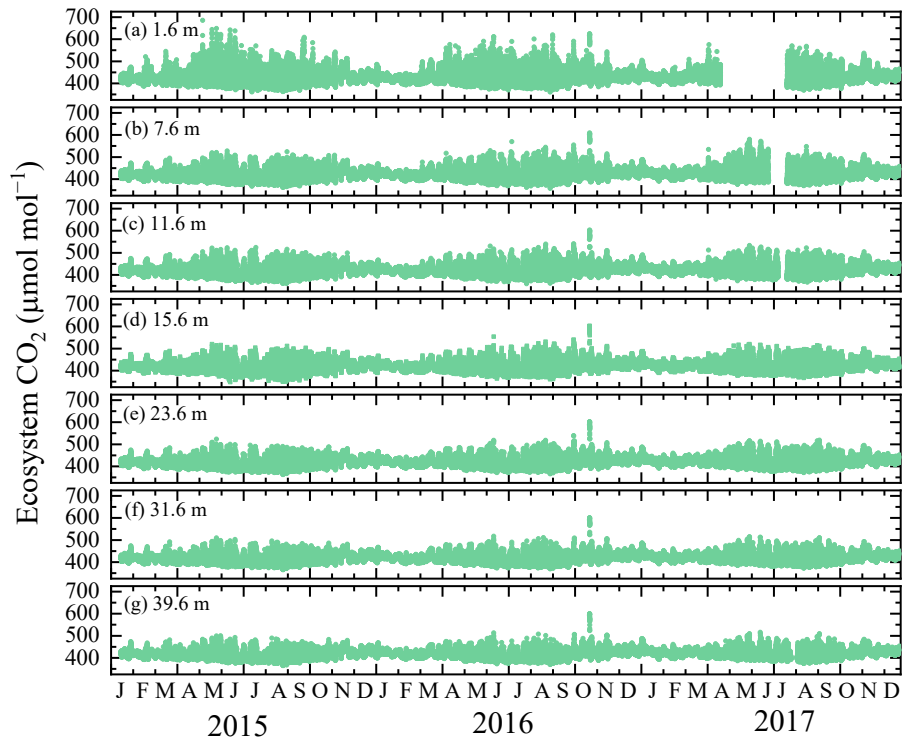

Figure S1. The original time series of ecosystem  $\text{CO}_2$  at seven heights in and above a subtropical plantation between 2015 and 2017. The sample size of the seven heights from the 1.6m were 64036, 68333, 69187, 69932, 69917, 69910, and 69298, respectively.

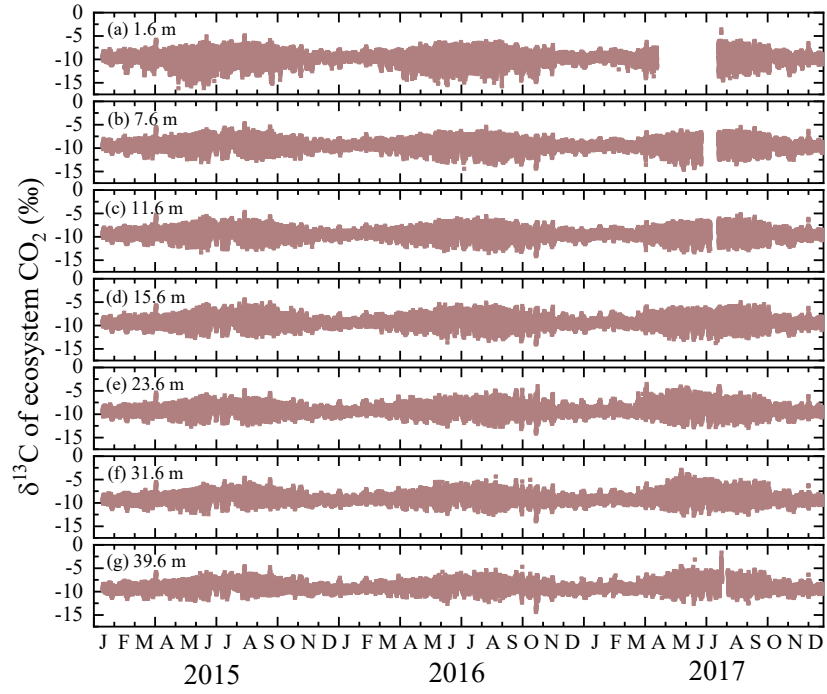

Figure S2. The original time series of  $\delta^{13}\text{C}$  of ecosystem  $\text{CO}_2$  at seven heights in and above a subtropical plantation between 2015 and 2017. The sample size of the seven heights from the 1.6m were 64036, 68333, 69187, 69932, 69917, 69910, and 69298, respectively.
